# Supplementary material
Source: HighWire-hosted journal article supplement (https://bmjopen.bmj.com/content/10/2/e033574)
Supplement: inline-supplementary-material-2 [file inline-supplementary-material-2.pdf]

| Does the quote refer to barriers or facilitators of the target behaviours <sup>A</sup> ? [If yes, continue]                                                                                                                                                                                                                                                                                                                                                                                                                                                                                                                                                                                                                                                                                                                                                                    |                                                                                                                                                                                                                                                                                                                                                                                                                                                                                                                                                                                                                                                                                                                                                                                                                                                                                                                                                                                                                                                                             |                                                                                                                                                                                                                                                                                                                                                                                                                             |                                                                                                                                                               |                                                                                                                                             |
|--------------------------------------------------------------------------------------------------------------------------------------------------------------------------------------------------------------------------------------------------------------------------------------------------------------------------------------------------------------------------------------------------------------------------------------------------------------------------------------------------------------------------------------------------------------------------------------------------------------------------------------------------------------------------------------------------------------------------------------------------------------------------------------------------------------------------------------------------------------------------------|-----------------------------------------------------------------------------------------------------------------------------------------------------------------------------------------------------------------------------------------------------------------------------------------------------------------------------------------------------------------------------------------------------------------------------------------------------------------------------------------------------------------------------------------------------------------------------------------------------------------------------------------------------------------------------------------------------------------------------------------------------------------------------------------------------------------------------------------------------------------------------------------------------------------------------------------------------------------------------------------------------------------------------------------------------------------------------|-----------------------------------------------------------------------------------------------------------------------------------------------------------------------------------------------------------------------------------------------------------------------------------------------------------------------------------------------------------------------------------------------------------------------------|---------------------------------------------------------------------------------------------------------------------------------------------------------------|---------------------------------------------------------------------------------------------------------------------------------------------|
| ↓                                                                                                                                                                                                                                                                                                                                                                                                                                                                                                                                                                                                                                                                                                                                                                                                                                                                              |                                                                                                                                                                                                                                                                                                                                                                                                                                                                                                                                                                                                                                                                                                                                                                                                                                                                                                                                                                                                                                                                             |                                                                                                                                                                                                                                                                                                                                                                                                                             |                                                                                                                                                               |                                                                                                                                             |
| Does the quote relate to [Note: it is possible that more than one of the following applies] ...                                                                                                                                                                                                                                                                                                                                                                                                                                                                                                                                                                                                                                                                                                                                                                                |                                                                                                                                                                                                                                                                                                                                                                                                                                                                                                                                                                                                                                                                                                                                                                                                                                                                                                                                                                                                                                                                             |                                                                                                                                                                                                                                                                                                                                                                                                                             |                                                                                                                                                               |                                                                                                                                             |
| ... pharmacists' own cognitive or informational resources?                                                                                                                                                                                                                                                                                                                                                                                                                                                                                                                                                                                                                                                                                                                                                                                                                     | ... pharmacists' planning of actions or reflections on past, current or future medication review practice?                                                                                                                                                                                                                                                                                                                                                                                                                                                                                                                                                                                                                                                                                                                                                                                                                                                                                                                                                                  | ... pharmacists' reactions, wants or needs, impulses, inhibitions or reflexive actions [rather than reasoned actions]?                                                                                                                                                                                                                                                                                                      | ... resources available to pharmacists or rules (e.g. health board directives) affecting pharmacists?                                                         | ... interpersonal relationships of pharmacists with other practice staff or practice culture?                                               |
| ↓                                                                                                                                                                                                                                                                                                                                                                                                                                                                                                                                                                                                                                                                                                                                                                                                                                                                              | ↓                                                                                                                                                                                                                                                                                                                                                                                                                                                                                                                                                                                                                                                                                                                                                                                                                                                                                                                                                                                                                                                                           | ↓                                                                                                                                                                                                                                                                                                                                                                                                                           | ↓                                                                                                                                                             | ↓                                                                                                                                           |
| If yes, choose from the following 'capability' domains:                                                                                                                                                                                                                                                                                                                                                                                                                                                                                                                                                                                                                                                                                                                                                                                                                        | If yes, choose from the following 'reflective motivation' domains:                                                                                                                                                                                                                                                                                                                                                                                                                                                                                                                                                                                                                                                                                                                                                                                                                                                                                                                                                                                                          | If yes, choose from the following 'automatic motivation' domains:                                                                                                                                                                                                                                                                                                                                                           | If yes, code <b>Environmental context and resources</b> <sup>B</sup> [Note: Consider coding impact on capability, reflective or automatic motivation domains] | If yes, code <b>Social Influences</b> <sup>B</sup> [Note: Consider coding impact on capability, reflective or automatic motivation domains] |
| <b>Knowledge</b> <sup>B</sup> – Awareness of or familiarity with sources of information needed to inform clinical decision making or implementation processes [Note: where judgement is involved, consider skills or decision making]<br><b>Skills</b> <sup>B</sup> – Abilities acquired or attainable through training or experience [rather than just ability to access or recall information = knowledge]<br><b>Memory, attention and decision making processes</b> <sup>B</sup> – Ability to process information and make appropriate clinical decisions [Note: this includes decisions around prioritising patients for review]<br><b>Behavioural regulation</b> <sup>B</sup> - Ability to manage, organise or prioritise work within practice [Note: where reference is made to competing demands, also consider environmental context and resources, social influences] | <b>Beliefs about capabilities</b> <sup>B</sup> – Confidence in own abilities relating to intervention implementation [Note: where this relates to the pharmacist's professional role, consider professional/social role and identity]<br><b>Professional/social role and identity</b> <sup>B</sup> Perceptions of the scope of practice, responsibilities and boundaries of practice pharmacists<br><b>Beliefs about consequences</b> <sup>B</sup> - Expectations of the impact of the intervention on patient outcomes, pharmacists' work, or their work environment<br><b>Goals</b> <sup>B</sup> – Expressions of personal or professional aims [Note: Code only if this appears to go beyond fulfilment of 'usual' professional role]<br><b>Optimism</b> <sup>B</sup> – Expressions of trust in the feasibility and benefits of the intervention [Note: Only code when there is an element of trust; otherwise code beliefs about consequences]<br><b>Intentions</b> <sup>B</sup> – Commitment to implement the intervention [Note: only code if commitment is explicit] | <b>Emotion</b> <sup>B</sup> – Pharmacists' feelings towards implementing the intervention [Note: Consider coding environmental context and resources, social influences as sources of emotions]<br><b>Reinforcement</b> <sup>B</sup> – Stimuli for pharmacists to engage (or not) in intervention implementation [Note: Consider coding environmental context and resources, social influences as sources of reinforcement] |                                                                                                                                                               |                                                                                                                                             |

A: Targeted behaviours are: pharmacist conducting case note reviews of DTRs identified by the P-DQIP tool and collaborate with GPs in DTR management; B: Where in doubt as to whether a quote reflects one domain or another, please code both. Where quotes reflect a cause and effect relationship between two or more domains, please code both the cause and the effect.
